# Supplementary material for: In-vivo effects of intraocular and intracranial pressures on the lamina cribrosa microstructure
Source: PLoS One. 2017 Nov 21;12(11):e0188302. doi: 10.1371/journal.pone.0188302 (PMC5697865; doi:10.1371/journal.pone.0188302)
Supplement: S1 Table — Raw data containing information regarding the monkey, intraocular pressure (IOP), intracranial pressure (ICP), beam thickness to pore diameter ratio (beam pore), beam thickness (beam), pore diameter (pore) and eye (OD–right, OS–left). (CSV) [file pone.0188302.s001.csv]

Monkey	IOP	ICP	Beam Pore	Beam	Pore	Eye
A	5	6	1.566406898	18.894	12.062	OD
A	5	6	1.213016013	16.514	13.614	OD
A	15	6	1.165154398	15.923	13.666	OD
A	15	6	1.268508459	16.346	12.886	OD
A	30	6	1.240111926	16.398	13.223	OD
A	30	6	1.257431765	16.539	13.153	OD
A	50	7	1.05160703	15.018	14.281	OD
A	50	7	1.354808073	17.118	12.635	OD
A	5	10	1.323173114	16.93	12.795	OD
A	5	10	1.076142837	15.49	14.394	OD
A	15	10	1.02795594	14.745	14.344	OD
A	15	10	1.077560941	15.074	13.989	OD
A	30	10	1.289477886	16.152	12.526	OD
A	30	10	1.136627485	15.665	13.782	OD
A	50	10	1.094241983	15.013	13.72	OD
A	50	10	1.085718426	14.984	13.801	OD
A	5	27	1.159309298	16.046	13.841	OD
A	15	27	1.102875629	15.341	13.91	OD
A	15	27	1.093976752	15.529	14.195	OD
A	30	27	1.250468973	16.665	13.327	OD
A	30	27	1.175861309	16.007	13.613	OD
A	30	45	1.527460972	18.884	12.363	OD
A	50	45	1.24437299	16.641	13.373	OD
A	50	45	1.228733599	16.669	13.566	OD
B	15	7	1.243659207	15.838	12.735	OD
B	30	7	1.256314535	15.817	12.59	OD
B	30	7	1.263848049	15.903	12.583	OD
B	50	7	1.241991754	15.664	12.612	OD
B	15	10	1.245755485	16.069	12.899	OD
B	15	10	1.22075732	15.926	13.046	OD
B	30	10	1.296089385	15.776	12.172	OD
B	30	10	1.220099865	15.394	12.617	OD
B	50	10	1.457389334	16.725	11.476	OD
B	15	25	1.270732289	15.982	12.577	OD
B	30	25	1.23855906	16.022	12.936	OD
B	30	25	1.232222393	16.046	13.022	OD
B	50	25	1.277669903	15.792	12.36	OD
B	5	45	1.466136503	16.777	11.443	OD
B	15	45	1.271238245	16.221	12.76	OD
C	15	7	1.410492701	15.459	10.96	OD
C	30	7	1.284522542	14.474	11.268	OD
C	5	5	1.430853945	15.851	11.078	OD
C	15	5	1.372603476	15.321	11.162	OD
C	30	5	1.2335188	14.632	11.862	OD
C	30	25	1.350578938	14.697	10.882	OD
D	8	5	1.101435705	17.645	16.02	OD
D	8	5	1.103864584	17.738	16.069	OD
D	15	4	1.132219814	17.76	15.686	OD
D	15	4	1.176033798	18.372	15.622	OD
D	30	5	1.173187306	17.782	15.157	OD
D	30	5	1.164970119	17.739	15.227	OD
D	40	5	1.226833779	17.913	14.601	OD
D	40	5	1.196044712	18.083	15.119	OD
D	8	12	1.078783346	17.308	16.044	OD
D	8	12	1.073599505	17.344	16.155	OD
D	15	8	1.140652447	18.182	15.94	OD
D	30	13	1.206583051	18.182	15.069	OD
D	30	12	1.219094086	18.49	15.167	OD
D	40	12	1.111132648	17.197	15.477	OD
D	40	12	1.12050465	17.23	15.377	OD
D	8	19	1.075131294	17.401	16.185	OD
D	8	19	1.063411931	17.273	16.243	OD
D	15	21	1.09818629	17.862	16.265	OD
D	15	20	1.102661125	17.776	16.121	OD
D	30	20	1.096720503	17.791	16.222	OD
D	40	19	1.203804166	17.974	14.931	OD
D	8	30	1.336621196	19.107	14.295	OD
D	15	35	1.262613454	18.919	14.984	OD
D	15	35	1.268774442	19.142	15.087	OD
D	30	34	1.123823957	17.798	15.837	OD
D	40	31	1.194437086	18.036	15.1	OD
D	40	32	1.214905258	18.209	14.988	OD
E	15	6	1.236895892	18.76	15.167	OD
E	15	6	1.243315152	18.692	15.034	OD
E	30	6	1.278034525	18.805	14.714	OD
E	30	6	1.263995207	18.989	15.023	OD
E	40	6	1.213978138	18.325	15.095	OD
E	8	6	1.159462543	18.294	15.778	OD
E	8	6	1.228783438	19.706	16.037	OD
E	15	11	1.170540645	18.23	15.574	OD
E	15	11	1.316300041	19.268	14.638	OD
E	30	11	1.28614876	19.453	15.125	OD
E	30	11	1.241562102	18.503	14.903	OD
E	40	11	1.243191178	18.715	15.054	OD
E	40	10	1.257085561	18.806	14.96	OD
E	8	10	1.283638321	19.08	14.864	OD
E	8	10	1.222112211	18.515	15.15	OD
E	15	21	1.246362564	19.017	15.258	OD
E	15	19	1.220188251	18.797	15.405	OD
E	30	21	1.220188251	18.797	15.405	OD
E	30	21	1.236684819	18.622	15.058	OD
E	40	22	1.173468074	18.231	15.536	OD
E	8	21	1.297538376	18.765	14.462	OD
E	8	21	1.314056505	18.837	14.335	OD
E	15	30	1.276496155	19.09	14.955	OD
E	15	30	1.293199477	18.807	14.543	OD
E	30	30	1.28388606	18.66	14.534	OD
E	30	30	1.19197376	18.534	15.549	OD
E	40	30	1.19773937	18.226	15.217	OD
E	40	30	1.196374622	18.216	15.226	OD
E	8	30	1.28140773	18.533	14.463	OD
E	8	29	1.337401547	18.848	14.093	OD
E	15	3	1.229850556	19.257	15.658	OS
E	15	4	1.22158911	19.295	15.795	OS
E	30	6	1.408734451	20.838	14.792	OS
E	30	6	1.417546038	20.553	14.499	OS
E	40	5	1.223612346	19.267	15.746	OS
E	40	5	1.214502274	19.228	15.832	OS
E	15	10	1.302757916	19.131	14.685	OS
E	15	11	1.305378908	19.706	15.096	OS
E	30	11	1.304840098	19.707	15.103	OS
E	30	11	1.232169764	19.626	15.928	OS
E	40	10	1.239076237	18.886	15.242	OS
E	40	10	1.192128756	18.962	15.906	OS
E	8	10	1.30256038	19.739	15.154	OS
E	8	10	1.246864855	19.587	15.709	OS
E	15	21	1.323307769	19.843	14.995	OS
E	30	20	1.235969552	19.16	15.502	OS
E	30	20	1.236575676	19.298	15.606	OS
E	40	20	1.312197856	18.729	14.273	OS
E	40	20	1.297130033	19.073	14.704	OS
E	8	20	1.112233584	18.056	16.234	OS
E	8	20	1.09011991	17.455	16.012	OS
E	15	30	1.251615074	18.599	14.86	OS
E	15	30	1.224265679	18.506	15.116	OS
E	30	29	1.245089111	19.142	15.374	OS
E	40	29	1.183403375	18.867	15.943	OS
E	40	30	1.151194287	18.7	16.244	OS
